# Supplementary material
Source: Springer Nature journal article supplement (https://www.springermedizin.de/resource/supplementary/12960_2012_343_MOESM3_ESM.pdf/9569884)
Supplement: MOESM3 [file 9569884]

FTEs in nursing professions  
2005 in ambulatory nursing  
care and (semi-) stationary  
nursing homes

X

Growth rates of hospital and long-  
term nursing cases according to  
'status quo' scenario

Growth rates of hospital and long-  
term nursing cases according to  
'compression of morbidity' scenario

Data Source: Health Personnel  
Accounting

Data Source: Hospital Statistics, Long-Term Nursing  
Statistics and 12<sup>th</sup> Coordinated Population Forecast
